# Supplementary material
Source: publisher figshare collection journal article supplement (https://tandf.figshare.com/ndownloader/files/14162798)
Supplement: Supplementary file 1 [file 14162798]

**Search strategy of Cochrane central register of trials (CENTRAL)**

| **OR** | **AND** | | |
| --- | --- | --- | --- |
| Population | **Intervention** | **Study design *** |
| Pulmonary surgical procedures [mh] [tiabkw] (p)  Thoracotomy [mh] [tiabkw] (p)  Thoracic surgery [mh] [tiabkw] (p)  Video assisted thoracic surgery [mh] [tiabkw] (p)  Video assisted thorascopic surgery [tiabkw] (p)  Lung surgery [tiabkw] (p)  Lung resectional surgery [tiabkw] (p)  Lung resection [tiabkw] (p)  Lung volume reduction surgery [tiabkw] (p)  Lobectomy [tiabkw] (p) | Respiratory physiotherapy [tiabkw]  Respiratory physical therapy [tiabkw]  Chest physiotherapy [tiabkw]  Chest physical therapy [tiabkw]  Lung physiotherapy [tiabkw]  Lung physical therapy [tiabkw]  Continuous positive airway pressure [tiabkw]  CPAP [tiabkw]  Noninvasive ventilation [tiabkw]  Bilevel positive airway pressure [tiabkw]  Biphasic positive airway pressure [tiabkw]  Positive expiratory pressure [tiabkw]  Intermittent positive pressure breathing [tiabkw]  Airway clearance technique [tiabkw]  Breathing exercises [tiabkw]  Incentive spirometry [tiabkw]  Sustained maximal inspiration [tiabkw]  Postural drainage [tiabkw]  Autogenic drainage [tiabkw]  Bronchial drainage [tiabkw]  Bronchial hygiene [tiabkw]  ELTGOL [tiabkw]  Forced expiratory technique [tiabkw]  Early ambulation [tiabkw]  Early mobilization [tiabkw] | Randomized controlled trial [pt]  Controlled clinical trial [pt]  Randomized [tiabkw]  Randomised [tiabkw]  Placebo [tiabkw]  Randomly [tiabkw]  Trial [tiabkw]  Groups [tiabkw]  Control group [tiabkw] |
| AND, OR denotes boolean operators  [mh] denotes MeSH term (exploded)  [tiabkw] denotes search in titel, abstract and key words (word variations have been searched)  [pt] denotes search in publication type  * Inspired by *Cochrane Highly Sensitive Search Strategy for identifying randomised trials in MEDLINE* (reference) | | |
